# Supplementary material
Source: PubMed Central journal article supplement (PMC10277923)
Supplement: mmc1.pdf [file mmc1.pdf]

## Supplementary Material

### Visualising SARS-CoV-2 infection of the lung in deceased COVID-19 patients

Jan Van Slambrouck, Mona Khan, Erik Verbeken, Sumin Choi, Vincent Geudens, Cedric Vanluyten, Simon Feys, Emiel Vanhulle, Elke Wollants, Kurt Vermeire, Charlotte De Fays, Lucia Aversa, Janne Kaes, Dirk Van Raemdonck, Robin Vos, Bart Vanaudenaerde, Gert De Hertogh, Els Wauters, Joost Wauters, Laurens J. Ceulemans, Peter Mombaerts

#### Table of contents of PDF file

Table S1: Summary of literature on histological visualisation of *SARS-CoV-2* RNA and SARS-CoV-2 protein with ISH and IHC

Table S2: Demographics, medical history, course and management of SARS-CoV-2 infection, and viral RNA assays on lung tissues samples of the COVID-19 cases

Table S3: Demographics, medical history, virology, and data on lung samples of the control cases

Table S4: *SARS-CoV-2* RNA assays on lung tissue samples

Table S5: Histopathological analysis of H&E-stained sections of the COVID-19 cases



Table S2: Demographics, medical history, course and management of SARS-CoV-2 infection, and viral RNA assays on lung tissues samples of the COVID-19 cases

| case ID | age | sex    | body mass index | smoking history; pack years | pre-COVID-19 respiratory disease                                                                   | pre-COVID-19 immunosuppressive drugs          | active malignancy               | treatment malignancy                                                  | comorbidities                                                                                                          | vaccination     | length hospital stay (days) | length ICU stay (days) | respiratory support                                                  | days intubated | pharmacological COVID-19 treatment                  | cause of death      | serology anti-N IgG | time of death | presumptive duration of illness (days) | diagnosis-to-death interval (days) | result last qRT-PCR before death | interval last qRT-PCR to death (days) | origin last sample for qRT-PCR | postmortem tissue sampling | postmortem interval | abundance RNA scope V puncta | SARS-CoV-2 qRT-PCR tissue |
|---------|-----|--------|-----------------|-----------------------------|----------------------------------------------------------------------------------------------------|-----------------------------------------------|---------------------------------|-----------------------------------------------------------------------|------------------------------------------------------------------------------------------------------------------------|-----------------|-----------------------------|------------------------|----------------------------------------------------------------------|----------------|-----------------------------------------------------|---------------------|---------------------|---------------|----------------------------------------|------------------------------------|----------------------------------|---------------------------------------|--------------------------------|----------------------------|---------------------|------------------------------|---------------------------|
| 1       | 71  | male   | 25.5            | former; 39                  | no                                                                                                 | anti-CD20 + anti-CD37 and entansine conjugate | diffuse large B-cell lymphoma   | anti-CD20 + anti-CD37 and entansine conjugate; prophylactic acyclovir | peripheral artery disease                                                                                              | pre-vaccination | 13                          | 12                     | mechanical ventilation                                               | 12             | hydroxychloroquine                                  | respiratory failure | negative            | March 2020    | 16                                     | 13                                 | positive                         | 11                                    | upper respiratory tract        | bedside                    | 15 min              | +++                          | not reported              |
| 2       | 76  | male   | not reported    | former                      | chronic obstructive pulmonary disease                                                              | no                                            | prostate carcinoma              | hormonal therapy with androgen receptor antagonist (Bicalutamide)     | no                                                                                                                     | pre-vaccination | 11                          | 11                     | mechanical ventilation, proning                                      | 10             | hydroxychloroquine                                  | respiratory failure | positive            | April 2020    | 18                                     | 11                                 | positive                         | 8                                     | lower respiratory tract        | bedside                    | 15 min              | 0                            | negative                  |
| 3       | 60  | male   | 25.3            | former                      | no                                                                                                 | methylprednisolone                            | no                              | not applicable                                                        | arterial hypertension, polymyalgia rheumatica                                                                          | pre-vaccination | 26                          | 23                     | mechanical ventilation, proning, extracorporeal membrane oxygenation | 21             | hydroxychloroquine, steroids, IL receptor modulator | COVID-19 sequelae   | positive            | May 2020      | 28                                     | 26                                 | negative                         | 3                                     | lower respiratory tract        | autopsy                    | 11 h                | +                            | negative                  |
| 4       | 67  | male   | not reported    | no                          | no                                                                                                 | No                                            | no                              | not applicable                                                        | no                                                                                                                     | pre-vaccination | 44                          | 44                     | mechanical ventilation, high-flow nasal cannula                      | 19 and 2       | hydroxychloroquine, steroids, IL receptor modulator | COVID-19 sequelae   | positive            | May 2020      | 51                                     | 44                                 | negative                         | 1                                     | lower respiratory tract        | autopsy                    | 19 h                | +                            | negative                  |
| 5       | 72  | female | 27.7            | no                          | no                                                                                                 | hydrocortisone                                | no                              | not applicable                                                        | granulomatosis with polyangiitis, chronic kidney disease, adrenal insufficiency                                        | pre-vaccination | 45                          | 45                     | mechanical ventilation, proning                                      | 44             | hydroxychloroquine, steroids                        | COVID-19 sequelae   | positive            | May 2020      | 56                                     | 45                                 | positive                         | 5                                     | lower respiratory tract        | autopsy                    | 41 h                | ++                           | not reported              |
| 6       | 89  | male   | 29              | active                      | no                                                                                                 | methylprednisolone                            | no                              | not applicable                                                        | arterial hypertension, type 2 diabetes mellitus, chronic kidney disease, coronary artery disease, rheumatoid arthritis | pre-vaccination | 5                           | 3                      | non-invasive ventilation, proning                                    | 0              | steroids                                            | respiratory failure | negative            | October 2020  | 9                                      | 5                                  | positive                         | 5                                     | upper respiratory tract        | bedside                    | 35 min              | +++                          | positive                  |
| 7       | 75  | male   | 27.3            | former; 40                  | no                                                                                                 | no                                            | metastasized prostate carcinoma | hormonal therapy with enzalutamide and leuprorelide                   | type 1 diabetes mellitus, coronary artery disease                                                                      | pre-vaccination | 17                          | 14                     | mechanical ventilation, proning                                      | 5              | steroids, IL receptor modulator                     | respiratory failure | positive            | October 2020  | 20                                     | 17                                 | positive                         | 5                                     | lower respiratory tract        | bedside                    | 15 min              | ++                           | positive                  |
| 8       | 90  | male   | 27              | no                          | no                                                                                                 | no                                            | no                              | not applicable                                                        | type 2 diabetes mellitus, coronary artery disease, heart failure                                                       | pre-vaccination | 5                           | 0                      | high-flow nasal cannula                                              | 0              | steroids, remdesivir                                | respiratory failure | negative            | October 2020  | 8                                      | 8                                  | positive                         | 8                                     | upper respiratory tract        | bedside                    | 45 min              | +++                          | positive                  |
| 9       | 69  | male   | not reported    | former; 60                  | no                                                                                                 | no                                            | no                              | not applicable                                                        | arterial hypertension, type 2 diabetes mellitus, chronic kidney disease, coronary artery disease                       | pre-vaccination | 22                          | 14                     | mechanical ventilation, proning                                      | 10             | steroids                                            | COVID-19 sequelae   | positive            | November 2020 | 29                                     | 22                                 | positive                         | 12                                    | lower respiratory tract        | bedside                    | 55 min              | 0                            | positive                  |
| 10      | 50  | female | 34.5            | former; 10                  | no                                                                                                 | no                                            | no                              | not applicable                                                        | No                                                                                                                     | pre-vaccination | 16                          | 16                     | mechanical ventilation, proning, extracorporeal membrane oxygenation | 14             | steroids, remdesivir                                | COVID-19 sequelae   | positive            | November 2020 | 21                                     | 21                                 | positive                         | 5                                     | lower respiratory tract        | bedside                    | 30 min              | +                            | positive                  |
| 11      | 82  | female | 26.9            | no                          | chronic obstructive pulmonary disease                                                              | no                                            | no                              | not applicable                                                        | type 2 diabetes mellitus, chronic kidney disease                                                                       | pre-vaccination | 10                          | 9                      | mechanical ventilation, proning                                      | 8              | steroids                                            | respiratory failure | positive            | November 2020 | 22                                     | 20                                 | positive                         | 8                                     | lower respiratory tract        | bedside                    | 15 min              | +                            | positive                  |
| 12      | 68  | male   | 29.4            | active                      | chronic obstructive pulmonary disease                                                              | no                                            | no                              | not applicable                                                        | with cardiomyopathy, peripheral artery disease                                                                         | pre-vaccination | 19                          | 19                     | mechanical ventilation                                               | 17             | steroids                                            | COVID-19 sequelae   | positive            | November 2020 | not reported                           | 34                                 | positive                         | 11                                    | lower respiratory tract        | bedside                    | 35 min              | +                            | positive                  |
| 13      | 87  | female | 40              | no                          | no                                                                                                 | no                                            | no                              | not applicable                                                        | arterial hypertension, type 2 diabetes mellitus                                                                        | pre-vaccination | 4                           | 0                      | high-flow nasal cannula                                              | 0              | steroids, remdesivir                                | respiratory failure | not reported        | November 2020 | 8                                      | 8                                  | positive                         | 8                                     | upper respiratory tract        | bedside                    | 115 min             | +++                          | positive                  |
| 14      | 68  | male   | 51.8            | former; 15                  | no                                                                                                 | no                                            | no                              | not applicable                                                        | arterial hypertension, coronary artery disease                                                                         | pre-vaccination | 25                          | 21                     | mechanical ventilation, proning, inhaled nitric oxide                | 10             | steroids                                            | COVID-19 sequelae   | positive            | November 2020 | 31                                     | 29                                 | positive                         | 9                                     | lower respiratory tract        | autopsy                    | 19 h                | ++                           | positive                  |
| 15      | 49  | male   | not reported    | not reported                | asthma                                                                                             | no                                            | no                              | not applicable                                                        | no                                                                                                                     | pre-vaccination | 32                          | 32                     | mechanical ventilation, proning, extracorporeal membrane oxygenation | 23             | steroids                                            | COVID-19 sequelae   | positive            | November 2020 | 39                                     | 32                                 | negative                         | 13                                    | lower respiratory tract        | autopsy                    | 18 h                | +                            | negative                  |
| 16      | 75  | male   | not reported    | not reported                | no                                                                                                 | no                                            | no                              | not applicable                                                        | arterial hypertension, chronic kidney disease                                                                          | not vaccinated  | 40                          | 37                     | mechanical ventilation                                               | 37             | steroids                                            | COVID-19 sequelae   | positive            | December 2020 | 43                                     | 41                                 | positive                         | 10                                    | lower respiratory tract        | autopsy                    | 19 h                | 0                            | positive                  |
| 17      | 81  | male   | 24.6            | former                      | no                                                                                                 | no                                            | no                              | not applicable                                                        | coronary artery disease                                                                                                | not vaccinated  | 21                          | 21                     | mechanical ventilation, proning                                      | 21             | steroids                                            | COVID-19 sequelae   | positive            | December 2020 | not reported                           | 21                                 | positive                         | 4                                     | lower respiratory tract        | autopsy                    | 66 h                | +                            | positive                  |
| 18      | 75  | male   | not reported    | not reported                | no                                                                                                 | no                                            | no                              | not applicable                                                        | no                                                                                                                     | not vaccinated  | 51                          | 47                     | mechanical ventilation, proning                                      | 47             | steroids, remdesivir                                | COVID-19 sequelae   | positive            | December 2020 | 58                                     | 51                                 | negative                         | 2                                     | upper respiratory tract        | bedside                    | 75 min              | 0                            | negative                  |
| 19      | 59  | male   | 40.8            | no                          | chronic obstructive pulmonary disease, chemotherapy and lobectomy for lung spinocellular carcinoma | no                                            | no                              | not applicable                                                        | arterial hypertension                                                                                                  | not vaccinated  | 30                          | 30                     | mechanical ventilation, proning, extracorporeal membrane oxygenation | 26             | steroids                                            | COVID-19 sequelae   | positive            | December 2020 | not reported                           | 37                                 | negative                         | 1                                     | upper respiratory tract        | bedside                    | 45 min              | +                            | positive                  |
| 20      | 82  | male   | not reported    | no                          | no                                                                                                 | no                                            | no                              | not applicable                                                        | no                                                                                                                     | not vaccinated  | 23                          | 23                     | mechanical ventilation, proning                                      | 11             | steroids                                            | respiratory failure | positive            | December 2020 | 24                                     | 23                                 | positive                         | 11                                    | lower respiratory tract        | bedside                    | 75 min              | +                            | positive                  |
| 21      | 47  | male   | 29.9            | no                          | no                                                                                                 | high-dose methylprednisolone for brain oedema | brain oligodendroglioma         | no                                                                    | fatal brain oedema after stereotactic biopsy; arterial hypertension                                                    | not vaccinated  | 7                           | 6                      | mechanical ventilation                                               | 6              | none                                                | brain tumour        | negative            | February 2021 | not reported                           | 2                                  | positive                         | 2                                     | upper respiratory tract        | bedside                    | 45 min              | +++                          | positive                  |
| 22      | 84  | male   | not reported    | no                          | no                                                                                                 | no                                            | no                              | not applicable                                                        | arterial hypertension                                                                                                  | not vaccinated  | 17                          | 13                     | non-invasive ventilation                                             | 0              | steroids                                            | respiratory failure | positive            | February 2021 | 23                                     | 20                                 | positive                         | 20                                    | upper respiratory tract        | bedside                    | 30 min              | ++                           | positive                  |

qRT-PCR: quantitative reverse-transcription polymerase chain reaction; anti-N IgG: anti-nucleocapsid immunoglobulin G; IL: interleukin; COVID 21 was diagnosed with SARS-CoV-2 infection at an intensive care unit and was already intubated for brain oedema with intracranial hypertension as complication of an earlier brain tumour biopsy.

Table S3: Demographics, medical history, virology, and data on lung samples of the control cases

| case ID | age (years) | sex  | body mass index | smoking | respiratory disease | immuno-compromised | comorbidities                                 | procurement                      | date of death | cause of death                  | days intubated | reason decline of lungs   | tissue samples | serology anti-N IgG | SARS-CoV-2 qRT-PCR tissue |
|---------|-------------|------|-----------------|---------|---------------------|--------------------|-----------------------------------------------|----------------------------------|---------------|---------------------------------|----------------|---------------------------|----------------|---------------------|---------------------------|
| 1       | 56          | male | 27              | no      | no                  | no                 | arterial hypertension, dilated cardiomyopathy | donation after brain death       | March 2019    | bacterial meningitis            | 10             | not reported              | right lung     | prepandemic         | negative                  |
| 2       | 68          | male | 25              | no      | no                  | no                 | coronary artery disease                       | donation after circulatory death | July 2019     | hypoxic-ischemic encephalopathy | 13             | pneumonia left lower lobe | right lung     | prepandemic         | negative                  |

Table S4: SARS-CoV-2 RNA assays on lung tissue samples

|               | case ID | diagnosis-to-death interval (days) | N1 qRT-PCR   | N2 qRT-PCR   | abundance RNAscope N puncta |
|---------------|---------|------------------------------------|--------------|--------------|-----------------------------|
| COVID cases   | 21      | 2                                  | 33.1         | 32.5         | +++                         |
|               | 6       | 5                                  | 22.8         | 22.9         | +++                         |
|               | 8       | 8                                  | 29.0         | 28.2         | +++                         |
|               | 13      | 8                                  | 31.9         | 31.0         | +++                         |
|               | 2       | 11                                 | negative     | negative     | 0                           |
|               | 1       | 13                                 | not reported | not reported | +++                         |
|               | 7       | 17                                 | 36.4         | 32.6         | ++                          |
|               | 11      | 20                                 | 34.8         | 34.5         | +                           |
|               | 22      | 20                                 | 35.0         | 32.3         | ++                          |
|               | 10      | 21                                 | 36.5         | 36.0         | +                           |
|               | 17      | 21                                 | 36.6         | 32.6         | +                           |
|               | 9       | 22                                 | 34.6         | 32.8         | 0                           |
|               | 20      | 23                                 | 29.6         | 24.9         | +                           |
|               | 3       | 26                                 | negative     | negative     | +                           |
|               | 14      | 29                                 | negative     | 31.8         | ++                          |
|               | 15      | 32                                 | negative     | negative     | +                           |
|               | 12      | 34                                 | negative     | 35.0         | +                           |
|               | 19      | 37                                 | 35.6         | 30.2         | +                           |
| 16            | 41      | negative                           | 36.0         | 0            |                             |
| 4             | 44      | negative                           | negative     | +            |                             |
| 5             | 45      | not reported                       | not reported | ++           |                             |
| 18            | 51      | negative                           | negative     | 0            |                             |
| CONTROL cases | 1       | not applicable                     | negative     | negative     | 0                           |
|               | 2       | not applicable                     | negative     | negative     | 0                           |

qRT-PCR=quantitative reverse-transcription polymerase chain reaction.

The COVID cases are ranked according to the interval between the time of diagnosis of SARS-CoV-2 infection and the time of death. PCR was performed on cryopreserved lung samples from COVID and control cases. The abundance of RNAscope N puncta is scored in a semiquantified manner as “+++” for diffuse detection, “++” for focal detection, “+” for rare detection and “0” for no detection.

The values for the CDC N1 and N2 viral RNA primers represent the cycling threshold (Ct); a Ct-value  $\geq 38$  was considered as negative result.

Table S5: Histopathological analysis of H&E-stained sections of the COVID-19 cases

| case ID | diagnosis-to-death interval (days) | abundance RNAscope N puncta | spatial distribution of histopathological injury |                     |               |              |            | characteristics of histopathological injury |                       |                       |                                     |                                                 |                                                    |                    |     |
|---------|------------------------------------|-----------------------------|--------------------------------------------------|---------------------|---------------|--------------|------------|---------------------------------------------|-----------------------|-----------------------|-------------------------------------|-------------------------------------------------|----------------------------------------------------|--------------------|-----|
|         |                                    |                             | bronchiole                                       | terminal bronchiole | centrilobular | mediolobular | panlobular | thrombus                                    | early exudative phase |                       |                                     | proliferative phase --- fibrotic phase          |                                                    |                    |     |
|         |                                    |                             |                                                  |                     |               |              |            |                                             | marked edema          | neutrophil infiltrate | neutrophil & mononuclear infiltrate | mononuclear infiltrate with very early fibrosis | mild fibrosis with residual mononuclear infiltrate | end-stage fibrosis |     |
| 21      | 2                                  | +++                         |                                                  |                     |               |              |            | recent                                      |                       | ++                    | +                                   |                                                 |                                                    |                    |     |
| 6       | 5                                  | +++                         |                                                  |                     |               |              |            |                                             |                       |                       |                                     |                                                 |                                                    |                    |     |
| 8       | 8                                  | +++                         |                                                  |                     |               |              |            |                                             | present               | +                     | +                                   | +                                               | +                                                  |                    |     |
| 13      | 8                                  | +++                         |                                                  |                     |               |              |            | recent                                      | present               | ++                    | +                                   |                                                 |                                                    |                    |     |
| 2       | 11                                 | 0                           |                                                  |                     |               |              |            |                                             |                       |                       |                                     |                                                 |                                                    |                    |     |
| 1       | 13                                 | +++                         |                                                  |                     |               |              |            |                                             |                       |                       | ++                                  | +                                               |                                                    |                    |     |
| 7       | 17                                 | ++                          |                                                  |                     |               |              |            |                                             |                       |                       | +                                   | +                                               |                                                    |                    |     |
| 11      | 20                                 | +                           |                                                  |                     |               |              |            | old                                         |                       |                       | +                                   | +                                               | ++                                                 |                    |     |
| 22      | 20                                 | ++                          |                                                  |                     |               |              |            |                                             |                       |                       |                                     | ++                                              | ++                                                 |                    |     |
| 10      | 21                                 | +                           |                                                  |                     |               |              |            | old                                         |                       |                       | +                                   | ++                                              | +                                                  |                    |     |
| 17      | 21                                 | +                           |                                                  |                     |               |              |            |                                             |                       | +++                   |                                     |                                                 |                                                    |                    |     |
| 9       | 22                                 | 0                           |                                                  |                     |               |              |            | old                                         |                       |                       | ++                                  | ++                                              |                                                    |                    |     |
| 20      | 23                                 | +                           |                                                  |                     |               |              |            |                                             |                       |                       | +                                   | +++                                             |                                                    |                    |     |
| 3       | 26                                 | +                           |                                                  |                     |               |              |            |                                             |                       | +++                   |                                     |                                                 |                                                    | +++                |     |
| 14      | 29                                 | ++                          |                                                  |                     |               |              |            |                                             |                       |                       | +                                   | ++                                              | ++                                                 |                    |     |
| 15      | 32                                 | +                           |                                                  |                     |               |              |            |                                             |                       |                       |                                     | +++                                             | +++                                                |                    |     |
| 12      | 34                                 | +                           |                                                  |                     |               |              |            | old                                         |                       |                       |                                     | +++                                             | +++                                                |                    |     |
| 19      | 37                                 | +                           |                                                  |                     |               |              |            |                                             |                       |                       |                                     | +++                                             | +++                                                |                    |     |
| 16      | 41                                 | 0                           |                                                  |                     |               |              |            |                                             |                       |                       |                                     |                                                 |                                                    | +++                |     |
| 4       | 44                                 | +                           |                                                  |                     |               |              |            |                                             | present               |                       |                                     |                                                 |                                                    |                    |     |
| 5       | 45                                 | ++                          |                                                  |                     |               |              |            | recent                                      |                       | +++                   |                                     |                                                 |                                                    |                    |     |
| 18      | 51                                 | 0                           |                                                  |                     |               |              |            |                                             |                       |                       |                                     |                                                 |                                                    |                    | +++ |

An H&E-stained lung tissue section of each case was interpreted blindly by a pathologist (Figure 2). The cases are ranked according to the increasing diagnosis-to-death interval. The distribution of pathological findings within the lung tissue is indicated with dark grey for histological structures that were predominantly affected and light grey for structures that were only affected to a limited extent. Inflammation and fibrosis are scored as '+++' for extensive, '++' for moderate, and '+' for limited signs of the specified characteristics of histopathological injury.
